# Supplementary material for: Humins Blending in Thermoreversible Diels–Alder Networks for Stiffness Tuning and Enhanced Healing Performance for Soft Robotics
Source: MDPI journal article supplement (doi:10.3390/polym14091657), 2022-04-20
Supplement: s1 [file s1]

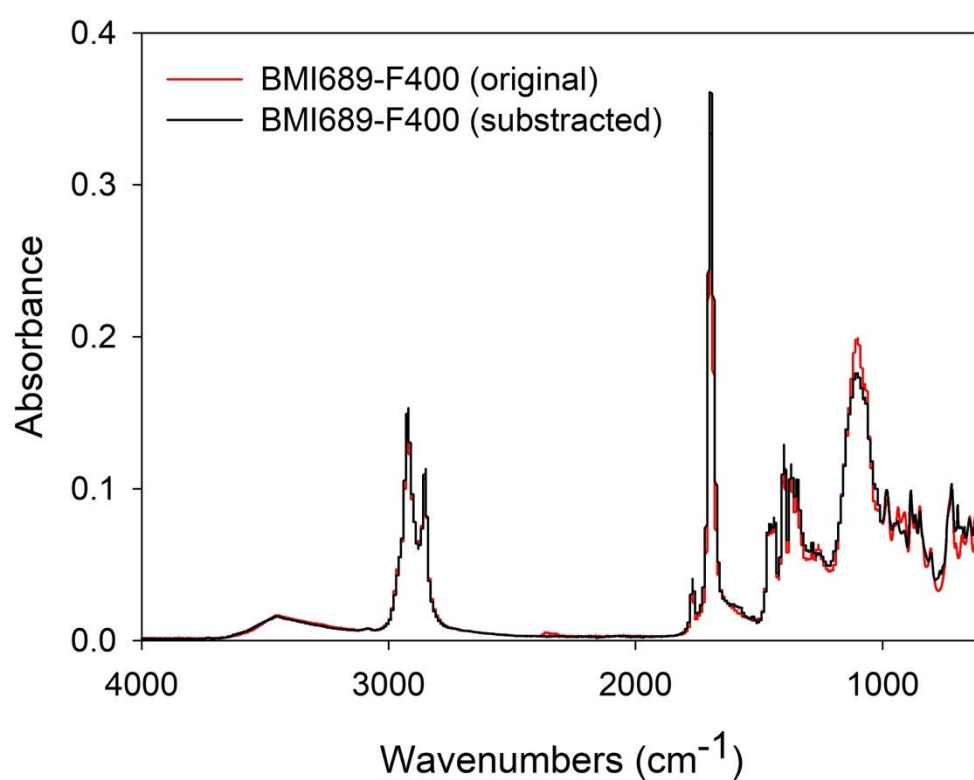

**Figure S1.** FT-IR spectra of raw BMI689-F400 (red line) and BMI689-F400 subtracted from the Humins-DA spectra (black line).

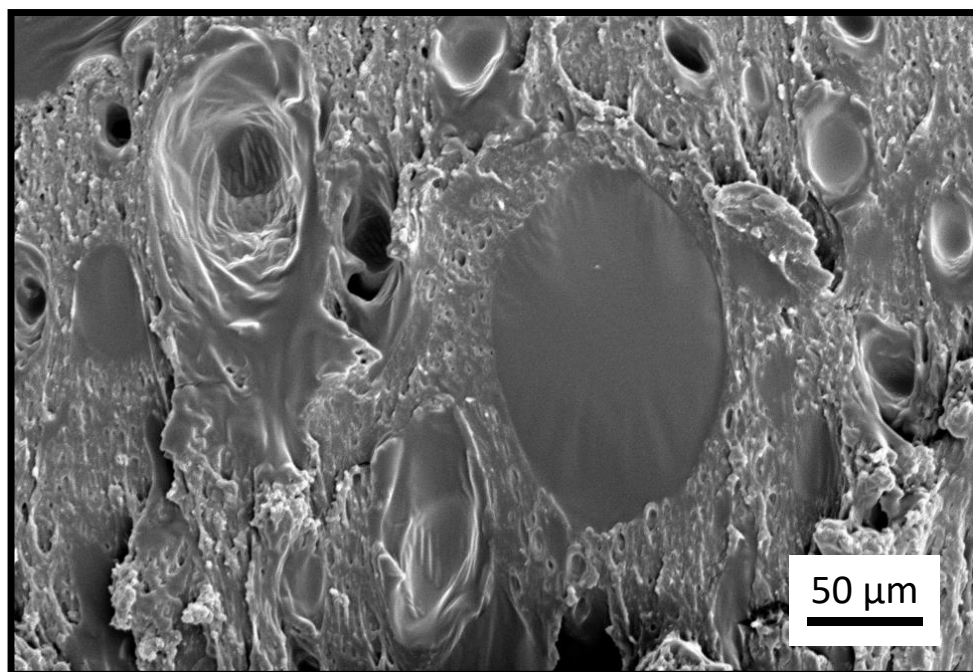

**Figure S2.** SEM picture of the Humins-DA crosssection thermally treated at 80°C for 2 hours.
